# Supplementary material for: Genetic Background and Kinetics Define Wound Bed Extracellular Vesicles in a Mouse Model of Cutaneous Injury
Source: Int J Mol Sci. 2021 Mar 29;22(7):3551. doi: 10.3390/ijms22073551 (PMC8037942; doi:10.3390/ijms22073551)
Supplement: Supplementary file 1 [file ijms-22-03551-s001.xlsx]

## Sheet: MISEV Guidelines
MISEV 2018 Framework
1. Collection and pre-processing:Pre-analytical variable
1.1. Source (Cell/Biological fluid/Tissue/Storage)	Biological fluid
1.1.1. Cell culture conditioned media	x
1) Passage number	x
2) Seeding density	x
3) Confluence at harvest	x
4) Culture volume/culture vessel/bioreactor	x
5) Surface coating of dish/Oxygen/Other gas tension	x
6) Stimulation and other tretment	x
1.1.2. Biological Fluid	o
1) Specise detail (cat#, aging, numbers)	C57BL/6 (Jackson Labs, #000664), NOD scid mice (Jackson Labs, #001303) and Leprdb (Jackson Labs, #000697) (male, 8-10 week)
2) Conditions (temperature, time)	room temperature with a 12-h light/dark cycle
3) How to obtain samples (Surgery, Tools)	Implantation of 3 sterile polyvinyl alcohol (PVA) sponges (PVA Unlimited, Warsaw, IN, USA) into the dorsum
4) EV collection	Collected 2day, 7day, 14day sample
1.1.3. EV harvest	o
1) Supplement (glucose/antibiotics/growth factor/serum)	x
2) Ideally EVs are obtained from culture media (w/o FCS/FBS)	x
3) Ultracentrifuge condition	o (Below)
4) Filtration or ultrafiltration (step by step)	x
2. EV isolation (Specifically)
2.1. Classic Ultracentrifuge	Beckman TL-100 Ultracentrifuge(Beckman Coulter, Brea, CA, USA)
1) g force	461 xg / 10,000 xg / 100,000 xg	Details: Three PVA sponges from one individual mouse were removed and washed in 1ml PBS in a 1.5ml EP microcentrifuge tube. After first centrifugation at 461g for 5min, Above 900ul supernatant was collected and transferred to a new 1.5ml EP microcentrifuge tube. Secondary centrifugation was performed at 10000g 4℃ for 30min, above 850ul supernatant was transferred to a 1.2ml Beckman ultracentrifug…
2) rotor	TLA120.2 rotor (Beckman Coulter, Brea, CA, USA)
3) k factor	k factor =12
4) Tube type	Beckman tube (Cat #343778, Polycarbonate centrifuge tube, Beckman coulter)
5) Time of collection	5 min / 30 min / 70 min
6) Temperature	4 OC
7) Brake	MAX brake (directly stop = level 9)
8) Gradient Ultracentrifugation	x
8)-(1) Materials (Vendor,Location,contury)
8)-(2) Densities	x
8)-(3) Volume	x
8)-(4) Top-down(pelleting) or bottom-up (floating)	x
9) Resuspend	100 ul PBS
9)-(1) Protein detection	RIPA buffer (89901,Thermo Fisher Scientific, USA)
2.2. Chromatography	x
1) Matrix nature	x
2) Pore size	x
3) Volume	x
4) Volume of loaded sample	x
5) Volume of fractions	x
6) Type of the elution buffer	x
7) Further processing of fractions	x
2.3. Immunoaffinity	Western bloting
1) Antibody (w/references)	CD9 (MA5-31980, 1:1000, Invitrogen, USA), CD63 (MA5-92370, 1:1000, Invitrogen, USA), CD81 (#10037, 1:1000, Cell Signaling, USA), Alix (#92880, 1:000, Cell Signaling, USA),2'nd AB : Anti-rabbit IgG HRP-linked antibody (#7074, 1:1000, Cell Signaling, USA)	Extracellular vesicles (EVs) from the PVA sponges were suspended in PBS. The EV samples were mixed with 4x NuPAGE® LDS Sample Buffer (NP0008, Invitrogen, USA) and boiled at 100 ℃ for 5 min. Those were loaded on 12 % acrylamide premade gel for SDS-PAGE, and transferred to the PVDF membrane for 2 h. The membrane were blocked by 3 % nonfat dry milk(NFDM) and primary antibodies diluted in 2.5 % NFDM …
2) Buffer, Volume	SB : 4x NuPAGE® LDS Sample Buffer (NP0008, Invitrogen, USA)
3) Detailed condition (membrane,skim milk)	12 % acrylamide premade gel for SDS-PAGE, PVDF membrane for 2 h, Blocking (3 % nonfat dry milk(NFDM)), 1'AB (2.5% NFDM for overnight at 4), 2'AB (1% NFDM for 1 h)
3) Particle number	x
4) Protein amount	total protein of EV sample from PVA sponge
5) Incubation time	Develop : 3 min ~ 10min
6) Temperature	Develop : Room Temp. (20~25 degree)
2.4. Commercial Kits	x
- May affect downstream profiling or functional studies	x
- Need to perform additional procedural control to separate EV	x
3. Characterization
3.1. Quantification of EVs
1) Protein amount (BCA or Bradford assay)	BCA assay kit (23227, Thermo Fisher Scientific, USA)
2) Total particle number (ex.NTA)	NanoSight NS300 (Malvern Instruments Ltd, Malvern, UK)
3) Lipid quantification (sulfophosphovanilin assay)	x
4) Total RNA (capillary electrophoresis instruments)
4)-(1) Target molecule (company or primer)	Rab5a (QT00171969, 104 bp), Rab35 (QT00107268, 89 bp), Vps4a (QT00145089, 110 bp), and Tsg101 (QT00143192, 107 bp)
4)-(2) Extraction buffer	TRIzol (Thermo Fisher Scientific, San Diego, CA, USA)
4)-(3) Concentration	2 μg of total RNA
4)-(4) Kit	BioRad Reverse Transcriptase Kit according to manufacturer's directions (Hercules, CA, USA)
4)-(5) Tools (Machine)	PCR (CFX96 Touch™ Real-Time PCR Detection System, #1855195, Hercules, CA,USA)
4)-(6) Dye	SYBR Green gene expression assays (OriGene, Rockville, MD)
4)-(7) Condition	95 °C (3min), [95 °C (10 s)+55 °C(10s)+72 °C(30s)]x40 cycle
4)-(8) Analysis (software, company, version)	CFX manager software (Version 3.1)
3.2. General Charactierization (Proteins)
1) Membrane protein or endosome	CD9, CD63, CD81
2) cytosolic/periplasmic protein	Alix
3.3. Single vesicles analysis
1) Electron microscopy (SEM/TEM/AFM/super-resolution microscopy)	x
2) NTA	1mL of a 1:100, Three videos, each of 60 seconds recordings, to analyze
3) High resolution flow cytometry	x
4) Flouresence properties	x

## Sheet: MIFlowCyt-EV guidelines
VFC experiment
1.﻿Preanalytical variables and experimental design
1.1 ﻿Report preanalytical variables conforming to MISEV guidelines	Three PVA sponges from one individual mouse were removed and washed in 1ml PBS in a 1.5ml EP microcentrifuge tube. After first centrifugation at 461g for 5min, Above 900ul supernatant was collected and transferred to a new 1.5ml EP microcentrifuge tube. Secondary centrifugation was performed at 10000g 4℃ for 30min, above 850ul supernatant was transferred to a 1.2ml Beckman ultracentrifuge tube(Ca…
1.2 ﻿Report experimental design according to MIFlowCyt guidelines	Our research was aimed to define the immunophenotype of EVs in wound bed in wildtype C57BL/6 mice((#000664) at different incubation time(day2, day7 and day 14) and compared with NOD scid mice((#001303) and Leprdb mice((#000697), focusing on immune-deficient and obese diabetic mouse strains. Di-8-based staining VFC techique was used to measure kinetic and genetic-based effects on EVs.
2.﻿Sample preparation
2.1 ﻿Sample staining	Each individual EV sample was normalized to day14-derived EV samples in terms of the approximated protein amount according to the BCA assay. Approximated fresh 10ug protein equivalent EV sample was resuspend in 10ul(day7 and day14 samples) or 20ul(day2 samples) PBS and incubated with a specific fluorescent membrane dye Di8-ANEPPS (Cat#D3167, Thermo fisher, US) staining buffer(12uM) which was comp…
2.2 ﻿Sample washing	After incubation with reagents, 1ml MACSQuant Runing Buffer with BSA(10%) was added to each tube and vortexed, unbounded antibodies were diluted but no specific wash steps to remove them.
2.3 ﻿Sample dilution	Each 10ug EV sample was diluted in 50ul staining system and then further diluted in 1ml MACSQuant Runing Buffer with BSA(10%) before subjected to Flow cytometor.
3. ﻿Assay controls
3.1﻿ Buffer-only controls	﻿A buffer-only control of 0.2 µm-filtered MACSQuant Running Buffer with BSA(10%) was recorded at the same flow cytometer acquisition settings as all other samples, including triggering threshold, voltages, and flow rate. Minimal background noise was observed only.
3.2 Buffer with reagent controls	﻿A buffer with reagent control (2.5ul APC-conjugated antibody and 20ul Di-8 staining buffer ) was recorded at the same flow cytometer acquisition settings as all other samples, including triggering threshold, voltages, and flow rate. Less than 0.0001% di-8 positive events was observed although background staining is quite obvious as other samples.
3.3 Unstained controls	Unstained samples(10ug EV sample in 50 µl MACSQuant Running Buffer with BSA) were measured and recorded at the same flow cytometer acquisition settings, including triggering threshold, voltages, and flow rate. Minimal background noise was observed only.
3.4 ﻿Isotype controls	None
3.5 ﻿Single-stained controls	Di-8 stained only control(EV samples with 20 µl di-8 staining buffer only) was recorded at the same flow cytometer acquisition settings as all other samples, including triggering threshold, voltages, and flow rate. Equivalent percentage of di-8 positive events was captured as other samples. we didn't use any other single-stained controls since we only use one APC-conjugated antibody for each anal…
3.6 ﻿Procedural controls	None
3.7 ﻿Serial dilution	Di-8 serial dilution controls (EV samples with di-8 staining buffer at different concentration 12 µM, 6 µM, 3 µM, 1.5 µM) were recorded at the same flow cytometer acquisition settings as all other samples, including triggering threshold, voltages, and flow rate. An increasing percentage of di-8 positive events was captured as the di-8 concentration was decreasing.
3.8 ﻿Detergent-treated EV samples	After diluted in 1ml MACSQuant Running Buffer with BSA(10%), stained samples were splited into two 500ul aliquots, one treated with 0.5% TritonX-100(Cat#?) and vortexed for 10 seconds at room temperature. Both samples treated with or without were measured at the same flow cytometer acquisition settings as all other samples, including triggering threshold, voltages, and flow rate. Di-8 positive an…
﻿4. Instrument calibration and data acquisition
4.1 ﻿Trigger channel(s) and threshold(s)	Each sample was analyzed by B3 channel(Di-8) and Side Scatter-H, B3 channel was triggered over 1.1V with voltages for each channel setting at 562V and 636V, Di-8 positive events were gated according to the buffer with reagents controls and TritonX-100 detergent controls and a desired minimum requirement of 100000 events were collected in this gate for further analysis of expression of APC-antibod…
4.2 ﻿Flow rate/volumetric quantification	﻿Samples were enumerated using the integral instrument flow rate sensors, resulting in a slow flow rate of 2000 events/sec, 200ul sample was uptaken by the flow cytometor for each detection.
4.3 ﻿Fluorescence calibration	Regular bead calibration by per recommentation of Miltenyi Biotec before running samples
4.4 ﻿Light scatter calibration	Regular bead calibration by per recommentation of Miltenyi Biotec before running samples
﻿5. EV characterization
5.1 ﻿EV diameter/surface area/volume approximation	NTA assay to measure diameter and concentration as described in MISEV
5.2 ﻿EV refractive index approximation	None
5.3 ﻿EV epitope number approximation	None
﻿6. FC data reporting
6.1 ﻿Complete MIFlowCyt checklist	Confirmed on every run
6.2 ﻿Calibrated channel detection range	Confirmed on every run
6.3 ﻿EV number concentration	Confirmed on every run
6.4 ﻿EV brightness	Confirmed on every run
7.﻿FC data sharing
﻿7.1 Share data to public repository	﻿FC files and the analysis workspace have been uploaded FlowRepository and can also be obtained by contacting the corresponding author
